# Supplementary material for: Local adaptation mediated niche expansion in correlation with genetic richness
Source: Research Square preprint supplement (doi:10.21203/rs.3.rs-506057/v1), 2021-05-25
Supplement: Supplementary file 1 [file 788edd48425822fbaf55be8c.xlsx]

## Sheet: S5
Table S5 Data set of the fitness assay. The growth fitness evaluated from a total of 2,220 growth curves was summarized. Environmental gradients and genomes indicate the growth conditions defined in Table S2 and the names of the genomes defined in Table S1, respectively. Whether the genomes/populations are Anc or Evo is indicated. The calculated growth rates and maximal OD600 are shown as Growth …
Environmental gradient	Genomes	Anc/Evo	Growth rate (1/h)	maxOD
C0	N0	Anc	0.889849	0.7594
C0	N0	Anc	0.87292	0.9024
C0	N0	Anc	0.808378	0.9256
C0	N0	Anc	0.898171	0.9232
C0	N0	Anc	0.863794	1.046
C0	N0	Anc	0.799045	0.8672
C0	N0	Anc	0.794618	0.8028
C0	N0	Anc	0.829114	0.831
C0	N0	Anc	0.804719	0.799
C0	N0	Anc	0.785299	0.796
C0	N0	Anc	0.928149	0.7998
C0	N0	Anc	0.809694	0.8074
C0	N0	Anc	0.831777	1.0194
C0	N0	Anc	0.94055	0.8522
C0	N0	Anc	1.06966	1.0458
C0	N0	Anc	1.11728	0.9948
C0	N0	Anc	0.0616603	0.007
C0	N0	Anc	0.991175	0.7904
C0	N0	Anc	1.01559	0.834
C0	N0	Anc	0.874421	0.8132
C0	N0	Anc	0.926708	0.834
C0	N0	Anc	0.87889	0.8132
C0	N0	Anc	0.730865	0.7054
C0	N0	Anc	0.854455	0.8904
C0	N0	Anc	0.906189	0.7396
C0	N0	Anc	1.03972	0.952
C0	N0	Anc	0.972955	1.0098
C0	N0	Anc	1.08738	0.9212
C0	N0	Anc	1.05207	0.8678
C0	N0	Anc	0.87262	0.9798
C0	N0	Anc	0.812573	0.7742
C0	N0	Anc	1.0627	0.7758
C0	N0	Anc	0.910907	0.7812
C0	N0	Anc	0.907473	0.772
C0	N0	Anc	0.966366	0.77
C0	N0	Anc	0.966366	0.763
C0	N0	Anc	0.685919	0.863
C0	N0	Anc	0.844085	1.129
C0	N0	Anc	0.875456	0.8568
C0	N0	Anc	0.814753	0.9696
C0	N0	Anc	0.909973	0.9754
C0	N0	Anc	0.953051	1.033
C0	N0	Anc	0.8685	1.0406
C0	N0	Anc	0.843152	0.9426
C0	N0	Anc	0.835332	1.0436
C0	N0	Anc	0.876413	0.9422
C0	N0	Anc	0.795834	1.009
C0	N0	Anc	0.852086	1.029
C0	N0	Anc	0.831777	1.1136
C0	N0	Anc	0.946849	0.8402
C0	N0	Anc	0.959158	0.8596
C0	N0	Anc	0.786445	0.892
C0	N0	Anc	0.87889	1.0832
C0	N0	Anc	1.07423	1.0608
C0	N0	Anc	0.823355	1.1044
C0	N0	Anc	1.09201	1.0196
C0	N0	Anc	0.823355	1.0468
C0	N0	Anc	1.09201	0.8862
C0	N0	Anc	0.912953	1.0844
C0	N0	Anc	0.93782	0.9792
C1	N0	Anc	0.831777	0.3642
C1	N0	Anc	0.928955	0.3294
C1	N0	Anc	0.883798	0.5016
C1	N0	Anc	0.811259	0.319
C1	N0	Anc	0.921034	0.4836
C1	N0	Anc	0.867621	0.3724
C1	N0	Anc	1.04775	0.4932
C1	N0	Anc	0.799238	0.4164
C1	N0	Anc	1.10061	0.4932
C1	N0	Anc	0.883798	0.4164
C1	N0	Anc	0.985541	0.4244
C1	N0	Anc	0.971099	0.3104
C10	N0	Anc	0.819077	0.4486
C10	N0	Anc	0.862393	0.4392
C10	N0	Anc	0.795571	0.4536
C10	N0	Anc	0.87889	0.436
C10	N0	Anc	0.849557	0.4434
C10	N0	Anc	0.846502	0.4486
C10	N0	Anc	0.840766	0.4442
C10	N0	Anc	0.79976	0.4472
C10	N0	Anc	0.836296	0.4626
C10	N0	Anc	0.888302	0.4412
C10	N0	Anc	0.869901	0.4954
C10	N0	Anc	0.87292	0.4334
C11	N0	Anc	0.840766	0.7912
C11	N0	Anc	0.902849	0.8794
C11	N0	Anc	0.856026	0.7722
C11	N0	Anc	0.814753	0.8602
C11	N0	Anc	0.730498	0.7804
C11	N0	Anc	0.893437	0.9542
C11	N0	Anc	0.837978	0.7676
C11	N0	Anc	0.921034	0.9268
C11	N0	Anc	0.716704	0.8886
C11	N0	Anc	0.856026	0.859
C11	N0	Anc	0.778364	0.7802
C11	N0	Anc	0.893437	0.8668
C12	N0	Anc	0.800592	0.7448
C12	N0	Anc	0.924354	0.881
C12	N0	Anc	1.00492	0.9148
C12	N0	Anc	0.914311	0.9042
C12	N0	Anc	0.791338	0.7504
C12	N0	Anc	0.93415	0.882
C12	N0	Anc	0.769699	0.7152
C12	N0	Anc	0.907473	0.8182
C12	N0	Anc	0.846502	0.7834
C12	N0	Anc	0.936722	0.8396
C12	N0	Anc	0.707065	0.9084
C12	N0	Anc	0.971099	0.82
C13	N0	Anc	0.716704	0.0954
C13	N0	Anc	0.63218	0.0804
C13	N0	Anc	0.643775	0.097
C13	N0	Anc	0.610423	0.082
C13	N0	Anc	0.672703	0.1034
C13	N0	Anc	0.651696	0.0806
C13	N0	Anc	0.792401	0.0956
C13	N0	Anc	0.685919	0.0794
C13	N0	Anc	0.856026	0.0952
C13	N0	Anc	0.661169	0.0786
C13	N0	Anc	0.601631	0.0784
C13	N0	Anc	0.655897	0.0808
C14	N0	Anc	0.733033	0.1714
C14	N0	Anc	1.05562	0.1102
C14	N0	Anc	0.659463	0.1838
C14	N0	Anc	0.778364	0.1118
C14	N0	Anc	0.485209	0.1724
C14	N0	Anc	0.636436	0.1148
C14	N0	Anc	0.472798	0.1866
C14	N0	Anc	0.554518	0.1046
C14	N0	Anc	0.574034	0.1824
C14	N0	Anc	0.554518	0.1044
C14	N0	Anc	0.526271	0.1312
C14	N0	Anc	0.643775	0.1114
C15	N0	Anc	1.04319	0.255
C15	N0	Anc	0.943712	0.2662
C15	N0	Anc	1.16057	0.2756
C15	N0	Anc	0.835096	0.2916
C15	N0	Anc	1.02598	0.2748
C15	N0	Anc	0.981263	0.2536
C15	N0	Anc	0.914311	0.3092
C15	N0	Anc	0.94781	0.284
C15	N0	Anc	0.94781	0.2526
C15	N0	Anc	0.823355	0.254
C15	N0	Anc	0.951818	0.2772
C15	N0	Anc	0.93782	0.2702
C16	N0	Anc	0.684687	0.8288
C16	N0	Anc	0.828429	0.8356
C16	N0	Anc	0.893437	0.825
C16	N0	Anc	0.807026	0.834
C16	N0	Anc	0.900517	0.8226
C16	N0	Anc	0.944342	0.8388
C16	N0	Anc	0.959158	0.8178
C16	N0	Anc	0.815838	0.8248
C16	N0	Anc	0.788323	0.8324
C16	N0	Anc	0.946849	0.843
C16	N0	Anc	0.766769	0.8284
C16	N0	Anc	0.763817	0.8402
C17	N0	Anc	0.94055	0.959
C17	N0	Anc	0.831777	0.82
C17	N0	Anc	0.910907	0.9656
C17	N0	Anc	0.928955	0.7666
C17	N0	Anc	1.02598	0.9764
C17	N0	Anc	0.971099	0.9016
C18	N0	Anc	0.8501	0.771
C18	N0	Anc	1.02598	0.7746
C18	N0	Anc	0.910907	0.812
C18	N0	Anc	0.912953	0.8362
C18	N0	Anc	1.10274	0.7662
C18	N0	Anc	0.949962	0.771
C19	N0	Anc	0.907473	0.6234
C19	N0	Anc	0.792401	0.6364
C19	N0	Anc	0.900517	0.6516
C19	N0	Anc	0.893437	0.6434
C19	N0	Anc	0.805961	0.6604
C19	N0	Anc	0.805961	0.6264
C2	N0	Anc	0.930911	0.5312
C2	N0	Anc	0.735312	0.5378
C2	N0	Anc	0.860705	0.548
C2	N0	Anc	0.971099	0.5258
C2	N0	Anc	0.859374	0.635
C2	N0	Anc	0.903513	0.5104
C2	N0	Anc	0.921034	0.587
C2	N0	Anc	0.885189	0.5392
C2	N0	Anc	0.904705	0.587
C2	N0	Anc	0.903513	0.5392
C2	N0	Anc	0.900517	0.5408
C2	N0	Anc	0.851293	0.5366
C20	N0	Anc	0.69968	0.1558
C20	N0	Anc	0.716704	0.156
C20	N0	Anc	0.805961	0.1644
C20	N0	Anc	0.921034	0.1446
C20	N0	Anc	0.669591	0.1368
C20	N0	Anc	0.669591	0.1466
C21	N0	Anc	0.439445	0.0288
C21	N0	Anc	0.162186	0.0102
C21	N0	Anc	0.235115	0.0072
C21	N0	Anc	0.738331	0.0438
C21	N0	Anc	0.235115	0.007
C21	N0	Anc	0.366516	0.0142
C22	N0	Anc	0.618144	0.0784
C22	N0	Anc	0.439445	0.0216
C22	N0	Anc	0.350187	0.0168
C22	N0	Anc	0.40464	0.0218
C22	N0	Anc	0.469088	0.0268
C22	N0	Anc	0.501105	0.0226
C23	N0	Anc	0.669591	0.8058
C23	N0	Anc	0.792401	0.8088
C23	N0	Anc	0.568891	0.81
C23	N0	Anc	0.655044	0.8044
C23	N0	Anc	0.792401	0.8122
C23	N0	Anc	0.668369	0.8428
C24	N0	Anc	0.922085	0.7482
C24	N0	Anc	0.972404	0.7572
C24	N0	Anc	0.895629	0.8942
C24	N0	Anc	0.816088	0.9472
C24	N0	Anc	0.860705	1.0532
C24	N0	Anc	0.787776	0.9042
C25	N0	Anc	0.916291	0.2446
C25	N0	Anc	0.781459	0.2368
C25	N0	Anc	0.843199	0.2384
C25	N0	Anc	0.954771	0.2362
C25	N0	Anc	0.954771	0.2438
C25	N0	Anc	0.909579	0.2392
C26	N0	Anc	0.730759	0.3302
C26	N0	Anc	0.784308	0.3348
C26	N0	Anc	0.754448	0.3596
C26	N0	Anc	0.706847	0.3466
C26	N0	Anc	0.777927	0.3378
C26	N0	Anc	0.747388	0.346
C27	N0	Anc	0.833853	0.7082
C27	N0	Anc	0.870233	0.7108
C27	N0	Anc	0.917622	0.7082
C27	N0	Anc	0.813728	0.7076
C27	N0	Anc	0.909579	0.7138
C27	N0	Anc	0.829114	0.723
C28	N0	Anc	0.620857	0.8762
C28	N0	Anc	0.665818	0.8828
C28	N0	Anc	0.685273	0.8616
C28	N0	Anc	0.661558	0.8686
C28	N0	Anc	0.668619	0.8482
C28	N0	Anc	0.60962	0.8658
C3	N0	Anc	0.770672	0.8592
C3	N0	Anc	0.769475	0.9024
C3	N0	Anc	0.770672	1.0292
C3	N0	Anc	0.791338	0.8334
C3	N0	Anc	0.771157	1.0102
C3	N0	Anc	0.785444	0.933
C3	N0	Anc	0.831777	1.0128
C3	N0	Anc	0.778364	1.0088
C3	N0	Anc	0.786845	1.0128
C3	N0	Anc	0.946849	1.0088
C3	N0	Anc	0.744687	1.0944
C3	N0	Anc	0.801728	1.0264
C4	N0	Anc	0.567422	0.8128
C4	N0	Anc	0.572443	0.8868
C4	N0	Anc	0.567254	0.8132
C4	N0	Anc	0.556053	0.8758
C4	N0	Anc	0.554518	0.8174
C4	N0	Anc	0.569389	0.8714
C4	N0	Anc	0.529621	0.8352
C4	N0	Anc	0.56312	0.8386
C4	N0	Anc	0.550081	0.8352
C4	N0	Anc	0.573745	0.8386
C4	N0	Anc	0.565145	0.8412
C4	N0	Anc	0.551521	0.8536
C5	N0	Anc	0.733169	1.055
C5	N0	Anc	0.759913	0.884
C5	N0	Anc	1.04857	0.9916
C5	N0	Anc	1.13434	1.0262
C5	N0	Anc	1.13434	1.084
C5	N0	Anc	1.06013	0.9742
C6	N0	Anc	0.871485	0.7396
C6	N0	Anc	0.723459	0.952
C6	N0	Anc	0.94856	1.0098
C6	N0	Anc	1.03972	0.9212
C6	N0	Anc	1.07003	0.8678
C6	N0	Anc	0.912275	0.9798
C7	N0	Anc	0.8746	0.8546
C7	N0	Anc	0.952119	1.0964
C7	N0	Anc	0.8746	1.0626
C7	N0	Anc	0.907645	1.1144
C7	N0	Anc	0.907645	1.1182
C7	N0	Anc	0.834579	1.059
C8	N0	Anc	1.01844	0.9204
C8	N0	Anc	1.01844	0.9726
C8	N0	Anc	1.05207	0.9012
C8	N0	Anc	1.10551	0.8232
C8	N0	Anc	0.91914	0.9478
C8	N0	Anc	1.01844	0.9726
C9	N0	Anc	0.643775	0.064
C9	N0	Anc	0.94055	0.0564
C9	N0	Anc	0.69968	0.0646
C9	N0	Anc	0.856026	0.0592
C9	N0	Anc	0.792401	0.0628
C9	N0	Anc	0.733033	0.0598
C9	N0	Anc	0.94055	0.0624
C9	N0	Anc	0.972955	0.0556
C9	N0	Anc	0.87889	0.0622
C9	N0	Anc	0.8746	0.0576
C9	N0	Anc	0.900517	0.0614
C9	N0	Anc	0.856026	0.0576
C0	N0	Evo	0.928335	0.546
C0	N0	Evo	0.947349	0.5686
C0	N0	Evo	0.978274	0.5512
C0	N0	Evo	0.984195	0.5404
C0	N0	Evo	1.02211	0.5536
C0	N0	Evo	0.864209	0.567
C0	N0	Evo	0.961658	0.7812
C0	N0	Evo	1.01371	0.7736
C0	N0	Evo	0.969066	0.7628
C0	N0	Evo	0.889849	0.7634
C0	N0	Evo	0.870874	0.7878
C0	N0	Evo	0.914146	0.7662
C0	N0	Evo	0.990724	0.7336
C0	N0	Evo	1.02278	0.7324
C0	N0	Evo	0.973705	0.759
C0	N0	Evo	0.956552	0.737
C0	N0	Evo	0.932302	0.7324
C0	N0	Evo	0.925297	0.7472
C0	N0	Evo	0.87889	0.7802
C0	N0	Evo	0.914494	0.774
C0	N0	Evo	0.892543	0.7958
C0	N0	Evo	0.922981	0.7804
C0	N0	Evo	0.870969	0.7876
C0	N0	Evo	0.826479	0.796
C0	N0	Evo	0.842736	0.8486
C0	N0	Evo	0.936722	0.8744
C0	N0	Evo	0.949962	0.7548
C0	N0	Evo	1.05412	0.736
C0	N0	Evo	1.01143	0.8072
C0	N0	Evo	0.943897	0.7632
C0	N0	Evo	0.928114	0.417
C0	N0	Evo	0.931272	0.4188
C0	N0	Evo	0.913557	0.4158
C0	N0	Evo	0.883541	0.4254
C0	N0	Evo	0.918266	0.422
C0	N0	Evo	0.87889	0.4196
C0	N0	Evo	0.93415	0.8322
C0	N0	Evo	0.891391	0.8566
C0	N0	Evo	0.983962	0.8302
C0	N0	Evo	0.87889	0.8008
C0	N0	Evo	0.948844	0.8054
C0	N0	Evo	0.939082	0.7812
C1	N0	Evo	1.01559	0.4682
C1	N0	Evo	0.914311	0.4124
C1	N0	Evo	0.907473	0.3728
C1	N0	Evo	0.968147	0.3474
C1	N0	Evo	0.959158	0.4692
C1	N0	Evo	0.916003	0.536
C10	N0	Evo	0.866248	0.787
C10	N0	Evo	0.98724	0.765
C10	N0	Evo	0.909194	0.7874
C10	N0	Evo	0.902267	0.7802
C10	N0	Evo	0.921034	0.766
C10	N0	Evo	0.865453	0.7752
C11	N0	Evo	0.851725	0.8294
C11	N0	Evo	0.844534	0.8224
C11	N0	Evo	0.907473	0.8048
C11	N0	Evo	0.852086	0.832
C11	N0	Evo	0.867198	0.8468
C11	N0	Evo	0.932302	0.7982
C12	N0	Evo	0.841654	0.724
C12	N0	Evo	0.846502	0.7258
C12	N0	Evo	0.87889	0.7408
C12	N0	Evo	0.805961	0.7594
C12	N0	Evo	0.838856	0.7582
C12	N0	Evo	0.838856	0.7272
C13	N0	Evo	0.659463	0.1974
C13	N0	Evo	0.608971	0.2232
C13	N0	Evo	0.616178	0.2188
C13	N0	Evo	0.620239	0.21
C13	N0	Evo	0.649073	0.2172
C13	N0	Evo	0.662383	0.2034
C14	N0	Evo	0.554518	0.2338
C14	N0	Evo	0.580333	0.2284
C14	N0	Evo	0.601631	0.2312
C14	N0	Evo	0.613159	0.2364
C14	N0	Evo	0.580333	0.2434
C14	N0	Evo	0.586535	0.2414
C15	N0	Evo	0.944342	0.3926
C15	N0	Evo	0.993963	0.3734
C15	N0	Evo	0.93576	0.355
C15	N0	Evo	0.921034	0.3508
C15	N0	Evo	0.87889	0.3604
C15	N0	Evo	0.844534	0.352
C16	N0	Evo	0.862171	0.976
C16	N0	Evo	0.841654	0.9358
C16	N0	Evo	0.856026	0.9056
C16	N0	Evo	0.747381	0.8286
C16	N0	Evo	0.786012	0.9342
C16	N0	Evo	0.766279	0.888
C17	N0	Evo	0.929515	0.2104
C17	N0	Evo	0.921034	0.2306
C17	N0	Evo	0.939082	0.3898
C17	N0	Evo	0.985541	0.3032
C17	N0	Evo	0.993963	0.4518
C17	N0	Evo	0.964319	0.2286
C18	N0	Evo	0.898171	0.8766
C18	N0	Evo	0.932858	0.8188
C18	N0	Evo	0.912045	0.8176
C18	N0	Evo	1.04496	0.8172
C18	N0	Evo	0.963678	0.8108
C18	N0	Evo	0.974447	0.8304
C19	N0	Evo	0.735312	0.6444
C19	N0	Evo	0.778364	0.6722
C19	N0	Evo	0.73074	0.6556
C19	N0	Evo	0.831777	0.6614
C19	N0	Evo	0.800592	0.5876
C19	N0	Evo	0.72982	0.6142
C2	N0	Evo	0.888646	0.444
C2	N0	Evo	0.814753	0.467
C2	N0	Evo	0.931797	0.4466
C2	N0	Evo	0.926916	0.4398
C2	N0	Evo	0.933156	0.4602
C2	N0	Evo	0.892006	0.4434
C20	N0	Evo	0.574827	0.6368
C20	N0	Evo	0.643775	0.6168
C20	N0	Evo	0.650387	0.6284
C20	N0	Evo	0.690888	0.601
C20	N0	Evo	0.716704	0.1602
C20	N0	Evo	0	0.006
C21	N0	Evo	0.53591	0.4094
C21	N0	Evo	0.582115	0.4002
C21	N0	Evo	0.665019	0.4498
C21	N0	Evo	0.634786	0.431
C21	N0	Evo	0.628239	0.3858
C21	N0	Evo	0.633648	0.4274
C22	N0	Evo	0.620239	0.442
C22	N0	Evo	0.650983	0.4032
C22	N0	Evo	0.667083	0.4134
C22	N0	Evo	0.658062	0.4218
C22	N0	Evo	0.689107	0.3874
C22	N0	Evo	0.689727	0.4098
C23	N0	Evo	0.853882	0.5664
C23	N0	Evo	0.859084	0.5236
C23	N0	Evo	0.812261	0.528
C23	N0	Evo	0.796145	0.5126
C23	N0	Evo	0.800992	0.51
C23	N0	Evo	0.816921	0.5154
C24	N0	Evo	0.925454	0.5826
C24	N0	Evo	0.971099	0.615
C24	N0	Evo	0.921034	0.6626
C24	N0	Evo	0.921034	0.6722
C24	N0	Evo	0.869715	0.7234
C24	N0	Evo	0.874829	0.6016
C25	N0	Evo	0.828989	0.1852
C25	N0	Evo	0.904215	0.1862
C25	N0	Evo	0.802133	0.1814
C25	N0	Evo	0.932302	0.185
C25	N0	Evo	0.899111	0.1776
C25	N0	Evo	0.838856	0.1792
C26	N0	Evo	0.928955	0.3274
C26	N0	Evo	0.989493	0.3258
C26	N0	Evo	0.984974	0.3292
C26	N0	Evo	0.959158	0.3266
C26	N0	Evo	0.838537	0.3664
C26	N0	Evo	0.921034	0.3294
C27	N0	Evo	0.980402	0.7282
C27	N0	Evo	0.93415	0.8238
C27	N0	Evo	0.853404	0.8304
C27	N0	Evo	0.972567	0.7474
C27	N0	Evo	1.0613	0.6676
C27	N0	Evo	0.942278	0.6592
C28	N0	Evo	0.898894	0.8998
C28	N0	Evo	0.789632	0.8066
C28	N0	Evo	0.856026	0.8766
C28	N0	Evo	0.677838	0.8688
C28	N0	Evo	0.708282	0.8562
C28	N0	Evo	0.696186	0.8446
C3	N0	Evo	0.927833	0.7734
C3	N0	Evo	0.748721	0.789
C3	N0	Evo	0.738331	0.7556
C3	N0	Evo	0.869048	0.7792
C3	N0	Evo	0.800592	0.7642
C3	N0	Evo	0.839282	0.7806
C4	N0	Evo	0.457752	0.9802
C4	N0	Evo	0.466259	0.9682
C4	N0	Evo	0.484806	0.9828
C4	N0	Evo	0.452144	0.9252
C4	N0	Evo	0.450405	0.9598
C4	N0	Evo	0.709227	0.8122
C5	N0	Evo	0.891391	0.7212
C5	N0	Evo	0.8501	0.7268
C5	N0	Evo	0.897498	0.7248
C5	N0	Evo	0.83344	0.7684
C5	N0	Evo	0.959158	0.7424
C5	N0	Evo	0.863794	0.7466
C6	N0	Evo	0.941164	0.7294
C6	N0	Evo	0.937252	0.7238
C6	N0	Evo	0.941456	0.7104
C6	N0	Evo	0.89901	0.7232
C6	N0	Evo	0.872712	0.7262
C6	N0	Evo	0.8344	0.7412
C7	N0	Evo	0.911184	0.7464
C7	N0	Evo	0.949962	0.7474
C7	N0	Evo	0.902986	0.7456
C7	N0	Evo	0.852086	0.743
C7	N0	Evo	0.909093	0.7408
C7	N0	Evo	0.880122	0.7522
C8	N0	Evo	0.851293	0.8546
C8	N0	Evo	0.836746	0.7962
C8	N0	Evo	0.867621	0.7706
C8	N0	Evo	0.85155	0.788
C8	N0	Evo	0.904705	0.8018
C8	N0	Evo	0.760384	0.8248
C9	N0	Evo	0.554518	0.0532
C9	N0	Evo	0.681899	0.0506
C9	N0	Evo	0.586535	0.0498
C9	N0	Evo	0.681899	0.0502
C9	N0	Evo	0.87889	0.0484
C9	N0	Evo	0.643775	0.0648
C0	N14	Anc	0.736048	0.6984
C0	N14	Anc	0.643775	0.6712
C0	N14	Anc	0.755609	0.6036
C0	N14	Anc	0.669591	0.6106
C0	N14	Anc	0.663291	0.6254
C0	N14	Anc	0.773574	0.6312
C0	N14	Anc	0.586535	0.536
C0	N14	Anc	0.63218	0.5256
C0	N14	Anc	0.592642	0.5752
C0	N14	Anc	0.653652	0.5608
C0	N14	Anc	0.659463	0.596
C0	N14	Anc	0.590363	0.5722
C0	N14	Anc	0.521979	0.5746
C0	N14	Anc	0.563507	0.561
C0	N14	Anc	0.568554	0.5722
C0	N14	Anc	0.653652	0.5472
C0	N14	Anc	0.598197	0.5942
C0	N14	Anc	0.519713	0.6668
C0	N14	Anc	0.733033	0.6096
C0	N14	Anc	0.601631	0.6094
C0	N14	Anc	0.509186	0.616
C0	N14	Anc	0.521623	0.5824
C0	N14	Anc	0.728494	0.6144
C0	N14	Anc	0.554518	0.6354
C0	N14	Anc	0.779993	0.6658
C0	N14	Anc	0.81723	0.645
C0	N14	Anc	0.816794	0.598
C0	N14	Anc	0.716704	0.6056
C0	N14	Anc	0.772796	0.6234
C0	N14	Anc	0.72039	0.6262
C0	N14	Anc	0.593467	0.5968
C0	N14	Anc	0.72039	0.5912
C0	N14	Anc	0.759313	0.5862
C0	N14	Anc	0.776968	0.573
C0	N14	Anc	0.757417	0.5694
C0	N14	Anc	0.801728	0.5724
C0	N14	Anc	0.685749	0.5944
C0	N14	Anc	0.779948	0.6374
C0	N14	Anc	0.749599	0.5828
C0	N14	Anc	0.595661	0.6532
C0	N14	Anc	0.741415	0.563
C0	N14	Anc	0.626956	0.638
C1	N14	Anc	0.479081	0.3172
C1	N14	Anc	0.439445	0.2984
C1	N14	Anc	0.596662	0.2684
C1	N14	Anc	0.627446	0.2536
C1	N14	Anc	0.610423	0.2816
C1	N14	Anc	0.610423	0.2748
C10	N14	Anc	0.633108	0.3276
C10	N14	Anc	0.652256	0.3274
C10	N14	Anc	0.641007	0.3224
C10	N14	Anc	0.586535	0.325
C10	N14	Anc	0.657649	0.3262
C10	N14	Anc	0.586535	0.3248
C11	N14	Anc	0.73074	0.8328
C11	N14	Anc	0.792401	0.832
C11	N14	Anc	0.798368	0.822
C11	N14	Anc	0.534458	0.8708
C11	N14	Anc	0.75394	0.819
C11	N14	Anc	0.786845	0.8064
C12	N14	Anc	0.501105	0.8024
C12	N14	Anc	0.586535	0.8314
C12	N14	Anc	0.610423	0.8704
C12	N14	Anc	0.590985	0.8572
C12	N14	Anc	0.475834	0.8818
C12	N14	Anc	0.519713	0.87
C13	N14	Anc	0.299487	0.133
C13	N14	Anc	0.263123	0.1272
C13	N14	Anc	0.332938	0.176
C13	N14	Anc	0.231681	0.1248
C13	N14	Anc	0.285026	0.1272
C13	N14	Anc	0.475834	0.2488
C14	N14	Anc	0.354921	0.1748
C14	N14	Anc	0.481589	0.2398
C14	N14	Anc	0.419929	0.2352
C14	N14	Anc	0.471462	0.1776
C14	N14	Anc	0.471462	0.2396
C14	N14	Anc	0.40464	0.2456
C15	N14	Anc	0.691696	0.2104
C15	N14	Anc	0.792064	0.2024
C15	N14	Anc	0.819077	0.2088
C15	N14	Anc	0.785444	0.197
C15	N14	Anc	0.723316	0.1996
C15	N14	Anc	0.748721	0.2042
C16	N14	Anc	0.503216	0.698
C16	N14	Anc	0.508365	0.668
C16	N14	Anc	0.561434	0.6652
C16	N14	Anc	0.560357	0.683
C16	N14	Anc	0.511232	0.6662
C16	N14	Anc	0.532022	0.6582
C17	N14	Anc	0.661823	0.5928
C17	N14	Anc	0.745525	0.6138
C17	N14	Anc	0.759388	0.5264
C17	N14	Anc	0.694268	0.5324
C17	N14	Anc	0.761064	0.5356
C17	N14	Anc	0.797359	0.581
C18	N14	Anc	0.75355	0.587
C18	N14	Anc	0.79804	0.5634
C18	N14	Anc	0.783098	0.5648
C18	N14	Anc	0.805961	0.541
C18	N14	Anc	0.754449	0.585
C18	N14	Anc	0.799045	0.5812
C19	N14	Anc	0.356799	0.4976
C19	N14	Anc	0.366516	0.511
C19	N14	Anc	0.352143	0.492
C19	N14	Anc	0.309276	0.4968
C19	N14	Anc	0.324372	0.496
C19	N14	Anc	0.354015	0.4962
C2	N14	Anc	0.599285	0.3622
C2	N14	Anc	0.725306	0.3542
C2	N14	Anc	0.773252	0.3732
C2	N14	Anc	0.653652	0.3442
C2	N14	Anc	0.627446	0.3626
C2	N14	Anc	0.595231	0.3746
C20	N14	Anc	0	0
C20	N14	Anc	0	0
C20	N14	Anc	0	-0.0004
C20	N14	Anc	0	0.001
C20	N14	Anc	0	0.002
C20	N14	Anc	0	0.001
C21	N14	Anc	0.601631	0.811
C21	N14	Anc	0.568554	0.786
C21	N14	Anc	0.592642	0.786
C21	N14	Anc	0.529422	0.789
C21	N14	Anc	0.590363	0.7848
C21	N14	Anc	0.582115	0.8366
C22	N14	Anc	0.505712	0.8256
C22	N14	Anc	0.447212	0.7842
C22	N14	Anc	0.501105	0.826
C22	N14	Anc	0.638744	0.8014
C22	N14	Anc	0.526746	0.804
C22	N14	Anc	0.526921	0.8524
C23	N14	Anc	0.665257	0.7874
C23	N14	Anc	0.51155	0.7938
C23	N14	Anc	0.566826	0.7942
C23	N14	Anc	0.539971	0.7782
C23	N14	Anc	0.557365	0.7482
C23	N14	Anc	0.574827	0.79
C24	N14	Anc	0.627446	0.6146
C24	N14	Anc	0.627446	0.6468
C24	N14	Anc	0.633648	0.6654
C24	N14	Anc	0.582115	0.6558
C24	N14	Anc	0.534	0.6116
C24	N14	Anc	0.610423	0.522
C25	N14	Anc	0.827405	0.1524
C25	N14	Anc	0.838246	0.1482
C25	N14	Anc	0.725306	0.1578
C25	N14	Anc	0.723003	0.1514
C25	N14	Anc	0.829497	0.147
C25	N14	Anc	0.528702	0.1284
C26	N14	Anc	0.651443	0.2282
C26	N14	Anc	0.625058	0.2326
C26	N14	Anc	0.720606	0.2422
C26	N14	Anc	0.576145	0.235
C26	N14	Anc	0.627446	0.2292
C26	N14	Anc	0.554518	0.2312
C27	N14	Anc	0.871413	0.5748
C27	N14	Anc	0.87889	0.5788
C27	N14	Anc	0.702157	0.5714
C27	N14	Anc	0.697188	0.5808
C27	N14	Anc	0.630215	0.6162
C27	N14	Anc	0.852651	0.558
C28	N14	Anc	0	0.0098
C28	N14	Anc	0	0.0248
C28	N14	Anc	0.277259	0.0198
C28	N14	Anc	0	0.0056
C28	N14	Anc	0	0.0062
C28	N14	Anc	0	-0.001
C3	N14	Anc	0.501105	0.6666
C3	N14	Anc	0.494705	0.5898
C3	N14	Anc	0.481589	0.5588
C3	N14	Anc	0.508185	0.5426
C3	N14	Anc	0.706577	0.764
C3	N14	Anc	0.759256	0.807
C4	N14	Anc	0.307653	0.723
C4	N14	Anc	0.297335	0.698
C4	N14	Anc	0.287234	0.6884
C4	N14	Anc	0.285243	0.6942
C4	N14	Anc	0.281646	0.7224
C4	N14	Anc	0.337072	0.744
C5	N14	Anc	0.554518	0.6088
C5	N14	Anc	0.537494	0.5756
C5	N14	Anc	0.523333	0.5616
C5	N14	Anc	0.547795	0.5656
C5	N14	Anc	0.589939	0.58
C5	N14	Anc	0.623725	0.5822
C6	N14	Anc	0.589322	0.5866
C6	N14	Anc	0.582115	0.5686
C6	N14	Anc	0.501105	0.5708
C6	N14	Anc	0.459449	0.5722
C6	N14	Anc	0.582115	0.578
C6	N14	Anc	0.554518	0.6266
C7	N14	Anc	0.493898	0.6476
C7	N14	Anc	0.627446	0.657
C7	N14	Anc	0.610423	0.63
C7	N14	Anc	0.541818	0.6366
C7	N14	Anc	0.485778	0.6376
C7	N14	Anc	0.610423	0.671
C8	N14	Anc	0.554518	0.8198
C8	N14	Anc	0.554518	0.7952
C8	N14	Anc	0.519713	0.8308
C8	N14	Anc	0.512374	0.8034
C8	N14	Anc	0.501105	0.7904
C8	N14	Anc	0.570847	0.7744
C9	N14	Anc	0.35248	0.0878
C9	N14	Anc	0.377785	0.0856
C9	N14	Anc	0	0.008
C9	N14	Anc	0.598197	0.0944
C9	N14	Anc	0.54281	0.0788
C9	N14	Anc	0.501105	0.0828
C0	N14	Evo	0.65537	0.4444
C0	N14	Evo	0.698519	0.4222
C0	N14	Evo	0.771964	0.4246
C0	N14	Evo	0.761695	0.423
C0	N14	Evo	0.778364	0.4202
C0	N14	Evo	0.697971	0.4202
C0	N14	Evo	0.714615	0.5964
C0	N14	Evo	0.754828	0.588
C0	N14	Evo	0.749375	0.5814
C0	N14	Evo	0.723885	0.5822
C0	N14	Evo	0.704673	0.5794
C0	N14	Evo	0.673736	0.594
C0	N14	Evo	0.802133	0.545
C0	N14	Evo	0.841654	0.5304
C0	N14	Evo	0.838856	0.5366
C0	N14	Evo	0.802133	0.5434
C0	N14	Evo	0.841654	0.525
C0	N14	Evo	0.669591	0.508
C0	N14	Evo	0.691696	0.6292
C0	N14	Evo	0.851293	0.6082
C0	N14	Evo	0.753816	0.6132
C0	N14	Evo	0.805961	0.615
C0	N14	Evo	0.792401	0.6126
C0	N14	Evo	0.716704	0.6184
C0	N14	Evo	0.770116	0.6152
C0	N14	Evo	0.789632	0.616
C0	N14	Evo	0.720197	0.6098
C0	N14	Evo	0.752125	0.6126
C0	N14	Evo	0.761695	0.6116
C0	N14	Evo	0.677838	0.6162
C0	N14	Evo	0.766769	0.6046
C0	N14	Evo	0.770116	0.613
C0	N14	Evo	0.946849	0.6128
C0	N14	Evo	0.907473	0.598
C0	N14	Evo	0.907473	0.6032
C0	N14	Evo	0.802133	0.597
C0	N14	Evo	0.805961	0.6126
C0	N14	Evo	0.738331	0.6148
C0	N14	Evo	0.900517	0.6164
C0	N14	Evo	0.907473	0.6174
C0	N14	Evo	0.893437	0.6104
C0	N14	Evo	0.831777	0.622
C1	N14	Evo	0.72982	0.2154
C1	N14	Evo	0.704395	0.215
C1	N14	Evo	0.752125	0.2004
C1	N14	Evo	0.851293	0.2018
C1	N14	Evo	0.792401	0.189
C1	N14	Evo	0.824569	0.2648
C10	N14	Evo	0.900517	0.332
C10	N14	Evo	0.738331	0.3278
C10	N14	Evo	0.910907	0.3266
C10	N14	Evo	0.889849	0.3258
C10	N14	Evo	0.811259	0.3306
C10	N14	Evo	0.708937	0.3372
C11	N14	Evo	0.811259	0.613
C11	N14	Evo	0.821649	0.6118
C11	N14	Evo	0.910907	0.6396
C11	N14	Evo	0.802133	0.6134
C11	N14	Evo	0.809753	0.6136
C11	N14	Evo	0.809753	0.6052
C12	N14	Evo	0.87889	0.428
C12	N14	Evo	0.844085	0.4236
C12	N14	Evo	0.94055	0.422
C12	N14	Evo	0.87889	0.4288
C12	N14	Evo	0.81723	0.4204
C12	N14	Evo	0.889849	0.4194
C13	N14	Evo	0.570847	0.2024
C13	N14	Evo	0.524875	0.2014
C13	N14	Evo	0.537494	0.1976
C13	N14	Evo	0.620239	0.2008
C13	N14	Evo	0.554518	0.1994
C13	N14	Evo	0.627446	0.1996
C14	N14	Evo	0.528702	0.2036
C14	N14	Evo	0.543498	0.2036
C14	N14	Evo	0.528702	0.206
C14	N14	Evo	0.554518	0.196
C14	N14	Evo	0.831777	0.203
C14	N14	Evo	0.669591	0.202
C15	N14	Evo	0.766769	0.2482
C15	N14	Evo	0.703888	0.2212
C15	N14	Evo	0.814753	0.2084
C15	N14	Evo	0.856026	0.2058
C15	N14	Evo	0.733033	0.2016
C15	N14	Evo	0.727663	0.195
C16	N14	Evo	0.705435	0.6572
C16	N14	Evo	0.741557	0.6396
C16	N14	Evo	0.655044	0.6738
C16	N14	Evo	0.643775	0.6532
C16	N14	Evo	0.634786	0.6558
C16	N14	Evo	0.601631	0.6618
C17	N14	Evo	0.867621	0.0952
C17	N14	Evo	0.753816	0.09
C17	N14	Evo	0.811259	0.0896
C17	N14	Evo	0.790865	0.0962
C17	N14	Evo	0.856026	0.0904
C17	N14	Evo	0.946849	0.096
C18	N14	Evo	0.87889	0.4088
C18	N14	Evo	0.868223	0.4382
C18	N14	Evo	0.802133	0.4176
C18	N14	Evo	0.856026	0.4354
C18	N14	Evo	0.794366	0.4134
C18	N14	Evo	0.738331	0.4188
C19	N14	Evo	0.519713	0.444
C19	N14	Evo	0.481589	0.472
C19	N14	Evo	0.461072	0.4442
C19	N14	Evo	0.623258	0.4732
C19	N14	Evo	0.537494	0.4428
C19	N14	Evo	0.537494	0.4456
C2	N14	Evo	0.690888	0.3042
C2	N14	Evo	0.744301	0.2928
C2	N14	Evo	0.921034	0.2828
C2	N14	Evo	0.851293	0.2828
C2	N14	Evo	0.851293	0.2854
C2	N14	Evo	0.805961	0.2912
C20	N14	Evo	0	0.008
C20	N14	Evo	0	0.006
C20	N14	Evo	0	0.0064
C20	N14	Evo	0	0.0094
C20	N14	Evo	0	0.007
C20	N14	Evo	0	0.004
C21	N14	Evo	0.651323	0.3938
C21	N14	Evo	0.681899	0.397
C21	N14	Evo	0.576954	0.3628
C21	N14	Evo	0.501105	0.3406
C21	N14	Evo	0.696186	0.4146
C21	N14	Evo	0.738331	0.3982
C22	N14	Evo	0.593315	0.3666
C22	N14	Evo	0.669591	0.371
C22	N14	Evo	0.758848	0.384
C22	N14	Evo	0.635264	0.4016
C22	N14	Evo	0.778364	0.3838
C22	N14	Evo	0.637573	0.3656
C23	N14	Evo	0.658501	0.3876
C23	N14	Evo	0.690582	0.3706
C23	N14	Evo	0.7318	0.3886
C23	N14	Evo	0.68812	0.3706
C23	N14	Evo	0.771157	0.3754
C23	N14	Evo	0.661556	0.3846
C24	N14	Evo	0.725495	0.583
C24	N14	Evo	0.802133	0.572
C24	N14	Evo	0.811259	0.66
C24	N14	Evo	0.838856	0.6614
C24	N14	Evo	0.711913	0.5718
C24	N14	Evo	0.72982	0.5648
C25	N14	Evo	0.565477	0.1354
C25	N14	Evo	0.605651	0.145
C25	N14	Evo	0.72982	0.1534
C25	N14	Evo	0.819077	0.1418
C25	N14	Evo	0.733033	0.1358
C25	N14	Evo	0.72982	0.1398
C26	N14	Evo	0.817641	0.2084
C26	N14	Evo	0.909766	0.2014
C26	N14	Evo	0.962778	0.2068
C26	N14	Evo	0.918167	0.2076
C26	N14	Evo	0.951289	0.2066
C26	N14	Evo	0.758848	0.2248
C27	N14	Evo	0.881842	0.5062
C27	N14	Evo	0.923783	0.5064
C27	N14	Evo	0.883461	0.508
C27	N14	Evo	0.691481	0.5446
C27	N14	Evo	0.847104	0.5172
C27	N14	Evo	0.756556	0.5258
C28	N14	Evo	0.663291	0.5954
C28	N14	Evo	0.766769	0.5404
C28	N14	Evo	0.778364	0.569
C28	N14	Evo	0.69384	0.5662
C28	N14	Evo	0.69968	0.5496
C28	N14	Evo	0.650983	0.5254
C3	N14	Evo	0.712515	0.6474
C3	N14	Evo	0.716704	0.6434
C3	N14	Evo	0.474977	0.7634
C3	N14	Evo	0.735312	0.6712
C3	N14	Evo	0.735312	0.6454
C3	N14	Evo	0.69968	0.7814
C4	N14	Evo	0.501105	0.6774
C4	N14	Evo	1.08322	0.6776
C4	N14	Evo	0.562765	0.795
C4	N14	Evo	0.494833	0.7222
C4	N14	Evo	0.501105	0.7046
C4	N14	Evo	0.550726	0.8562
C5	N14	Evo	0.778364	0.6162
C5	N14	Evo	0.841654	0.6038
C5	N14	Evo	0.716704	0.6024
C5	N14	Evo	0.758848	0.6064
C5	N14	Evo	0.838856	0.603
C5	N14	Evo	0.796972	0.6068
C6	N14	Evo	0.745287	0.6142
C6	N14	Evo	0.921034	0.5998
C6	N14	Evo	0.721799	0.6078
C6	N14	Evo	0.805961	0.6056
C6	N14	Evo	0.792401	0.6052
C6	N14	Evo	0.679092	0.6892
C7	N14	Evo	0.744301	0.6288
C7	N14	Evo	0.753092	0.631
C7	N14	Evo	0.87889	0.638
C7	N14	Evo	0.821649	0.613
C7	N14	Evo	0.738331	0.6998
C7	N14	Evo	0.805961	0.6344
C8	N14	Evo	0.792401	0.6484
C8	N14	Evo	0.681899	0.646
C8	N14	Evo	0.809753	0.6538
C8	N14	Evo	0.893437	0.6456
C8	N14	Evo	0.72982	0.649
C8	N14	Evo	0.731251	0.6338
C9	N14	Evo	0.848105	0.0434
C9	N14	Evo	0.831777	0.0408
C9	N14	Evo	0.87889	0.0416
C9	N14	Evo	0.831777	0.042
C9	N14	Evo	0.733033	0.0382
C9	N14	Evo	0.856026	0.0626
C0	N20	Anc	0.205431	0.658
C0	N20	Anc	0.196166	0.633
C0	N20	Anc	0.205328	0.5922
C0	N20	Anc	0.192092	0.6338
C0	N20	Anc	0.202946	0.6368
C0	N20	Anc	0.190195	0.653
C0	N20	Anc	0.260742	0.6194
C0	N20	Anc	0.330912	0.587
C0	N20	Anc	0.285618	0.589
C0	N20	Anc	0.344901	0.5334
C0	N20	Anc	0.291206	0.6078
C0	N20	Anc	0.223496	0.6232
C0	N20	Anc	0.61088	0.623
C0	N20	Anc	0.67094	0.5616
C0	N20	Anc	0.637409	0.5412
C0	N20	Anc	0.698267	0.5436
C0	N20	Anc	0.754828	0.6014
C0	N20	Anc	0.612899	0.5502
C0	N20	Anc	0.579439	0.6854
C0	N20	Anc	0.492857	0.6324
C0	N20	Anc	0.496177	0.6238
C0	N20	Anc	0.504661	0.5906
C0	N20	Anc	0.468029	0.6014
C0	N20	Anc	0.424898	0.6352
C0	N20	Anc	0.576145	0.6544
C0	N20	Anc	0.59163	0.642
C0	N20	Anc	0.669591	0.638
C0	N20	Anc	0.653187	0.627
C0	N20	Anc	0.541818	0.611
C0	N20	Anc	0.557074	0.6368
C0	N20	Anc	0.466574	0.6048
C0	N20	Anc	0.430456	0.599
C0	N20	Anc	0.435121	0.6518
C0	N20	Anc	0.455774	0.5964
C0	N20	Anc	0.451386	0.6092
C0	N20	Anc	0.443132	0.6126
C0	N20	Anc	0.619412	0.372
C0	N20	Anc	0.486558	0.332
C0	N20	Anc	0.587344	0.3458
C0	N20	Anc	0.597376	0.3484
C0	N20	Anc	0.615481	0.3296
C0	N20	Anc	0.55664	0.3466
C1	N20	Anc	0.562545	0.206
C1	N20	Anc	0.536154	0.215
C1	N20	Anc	0.623771	0.2114
C1	N20	Anc	0.682881	0.1862
C1	N20	Anc	0.623826	0.1784
C1	N20	Anc	0.622718	0.1998
C10	N20	Anc	0.490146	0.317
C10	N20	Anc	0.53591	0.306
C10	N20	Anc	0.4704	0.3128
C10	N20	Anc	0.42186	0.3198
C10	N20	Anc	0.427136	0.323
C10	N20	Anc	0.517107	0.3228
C11	N20	Anc	0.690888	0.7746
C11	N20	Anc	0.560594	0.7052
C11	N20	Anc	0.47712	0.7914
C11	N20	Anc	0.569389	0.7836
C11	N20	Anc	0.578131	0.7704
C11	N20	Anc	0.443236	0.784
C12	N20	Anc	0.578244	0.5698
C12	N20	Anc	0.547479	0.5694
C12	N20	Anc	0.460582	0.5978
C12	N20	Anc	0.439445	0.6692
C12	N20	Anc	0.517434	0.584
C12	N20	Anc	0.492116	0.5926
C13	N20	Anc	0	0.006
C13	N20	Anc	0	0.0062
C13	N20	Anc	0	0.006
C13	N20	Anc	0	0.004
C13	N20	Anc	0	0.005
C13	N20	Anc	0	0.006
C14	N20	Anc	0.247616	0.0404
C14	N20	Anc	0.277259	0.0378
C14	N20	Anc	0.324372	0.0378
C14	N20	Anc	0.324372	0.0388
C14	N20	Anc	0.392332	0.0378
C14	N20	Anc	0.324372	0.0382
C15	N20	Anc	0.632964	0.2354
C15	N20	Anc	0.663291	0.2258
C15	N20	Anc	0.625058	0.231
C15	N20	Anc	0.658247	0.2126
C15	N20	Anc	0.612591	0.227
C15	N20	Anc	0.57262	0.2122
C16	N20	Anc	0.282628	0.1086
C16	N20	Anc	0.277259	0.0954
C16	N20	Anc	0.288527	0.0998
C16	N20	Anc	0.23608	0.103
C16	N20	Anc	0.304856	0.1018
C16	N20	Anc	0.258651	0.0722
C17	N20	Anc	0.822581	0.5914
C17	N20	Anc	0.862171	0.6032
C17	N20	Anc	0.835509	0.568
C17	N20	Anc	0.73244	0.5518
C17	N20	Anc	0.772609	0.5778
C17	N20	Anc	0.582115	0.6838
C18	N20	Anc	0.830459	0.6118
C18	N20	Anc	0.826334	0.5338
C18	N20	Anc	0.852998	0.484
C18	N20	Anc	0.747931	0.4908
C18	N20	Anc	0.727972	0.5058
C18	N20	Anc	0.652378	0.4866
C19	N20	Anc	0.340173	0.4048
C19	N20	Anc	0.357527	0.2502
C19	N20	Anc	0.357527	0.2204
C19	N20	Anc	0.344889	0.2514
C19	N20	Anc	0.358435	0.2434
C19	N20	Anc	0.392332	0.307
C2	N20	Anc	0.696505	0.3204
C2	N20	Anc	0.428633	0.3286
C2	N20	Anc	0.63218	0.32
C2	N20	Anc	0.620239	0.2756
C2	N20	Anc	0.740954	0.3158
C2	N20	Anc	0.613572	0.3066
C20	N20	Anc	0	0
C20	N20	Anc	0	0
C20	N20	Anc	0	0
C20	N20	Anc	0	0
C20	N20	Anc	0	0
C20	N20	Anc	0	0
C21	N20	Anc	0	0
C21	N20	Anc	0	0.002
C21	N20	Anc	0	0.002
C21	N20	Anc	0	0
C21	N20	Anc	0	-0.001
C21	N20	Anc	0	0
C22	N20	Anc	0	0.0014
C22	N20	Anc	0	0.001
C22	N20	Anc	0	0.001
C22	N20	Anc	0	0
C22	N20	Anc	0	0.002
C22	N20	Anc	0	0
C23	N20	Anc	0	0.0018
C23	N20	Anc	0	0
C23	N20	Anc	0	0
C23	N20	Anc	0	0.002
C23	N20	Anc	0	0.0024
C23	N20	Anc	0	0.003
C24	N20	Anc	0.186095	0.4768
C24	N20	Anc	0.192092	0.4954
C24	N20	Anc	0.176072	0.456
C24	N20	Anc	0.180157	0.4898
C24	N20	Anc	0.240795	0.4926
C24	N20	Anc	0.161418	0.4728
C25	N20	Anc	0.368354	0.158
C25	N20	Anc	0.37804	0.1564
C25	N20	Anc	0.359539	0.1596
C25	N20	Anc	0.384904	0.1544
C25	N20	Anc	0.354613	0.1588
C25	N20	Anc	0.333541	0.1604
C26	N20	Anc	0.316554	0.2372
C26	N20	Anc	0.34095	0.229
C26	N20	Anc	0.337582	0.2274
C26	N20	Anc	0.350508	0.2364
C26	N20	Anc	0.318526	0.2404
C26	N20	Anc	0.289943	0.2418
C27	N20	Anc	0.358352	0.598
C27	N20	Anc	0.411574	0.5452
C27	N20	Anc	0.402278	0.5392
C27	N20	Anc	0.36624	0.5944
C27	N20	Anc	0.297276	0.5614
C27	N20	Anc	0.36295	0.5558
C28	N20	Anc	0	0
C28	N20	Anc	0	-0.001
C28	N20	Anc	0	0.0018
C28	N20	Anc	0	0.001
C28	N20	Anc	0	0.002
C28	N20	Anc	0	0.001
C3	N20	Anc	0.600428	0.6006
C3	N20	Anc	0.518673	0.6592
C3	N20	Anc	0.633648	0.5088
C3	N20	Anc	0.569389	0.5466
C3	N20	Anc	0.541402	0.5634
C3	N20	Anc	0.416582	0.6058
C4	N20	Anc	0.278979	0.8746
C4	N20	Anc	0.196918	0.6798
C4	N20	Anc	0.198925	0.7222
C4	N20	Anc	0.197719	0.6652
C4	N20	Anc	0.214422	0.6434
C4	N20	Anc	0.224269	0.7726
C5	N20	Anc	0.557286	0.6244
C5	N20	Anc	0.667502	0.519
C5	N20	Anc	0.769475	0.5172
C5	N20	Anc	0.596925	0.5042
C5	N20	Anc	0.656211	0.536
C5	N20	Anc	0.617017	0.615
C6	N20	Anc	0.439445	0.6642
C6	N20	Anc	0.574594	0.7076
C6	N20	Anc	0.662776	0.5128
C6	N20	Anc	0.458961	0.7314
C6	N20	Anc	0.544037	0.6316
C6	N20	Anc	0.439445	0.7052
C7	N20	Anc	0.395445	0.8006
C7	N20	Anc	0.379632	0.7718
C7	N20	Anc	0.375308	0.7212
C7	N20	Anc	0.364224	0.6808
C7	N20	Anc	0.358005	0.6898
C7	N20	Anc	0.368562	0.7088
C8	N20	Anc	0.409242	0.8978
C8	N20	Anc	0.398171	0.945
C8	N20	Anc	0.42186	0.975
C8	N20	Anc	0.403927	0.8604
C8	N20	Anc	0.406955	0.8952
C8	N20	Anc	0.390404	0.9358
C9	N20	Anc	0.317292	0.0538
C9	N20	Anc	0.32225	0.0558
C9	N20	Anc	0.310612	0.055
C9	N20	Anc	0.338919	0.0534
C9	N20	Anc	0.401321	0.0514
C9	N20	Anc	0.338919	0.0512
C0	N20	Evo	0.67456	0.5894
C0	N20	Evo	0.662169	0.6854
C0	N20	Evo	0.738331	0.583
C0	N20	Evo	0.703143	0.5838
C0	N20	Evo	0.689107	0.5958
C0	N20	Evo	0.595579	0.5906
C0	N20	Evo	0.72982	0.5602
C0	N20	Evo	0.735312	0.559
C0	N20	Evo	0.667411	0.5594
C0	N20	Evo	0.688766	0.5488
C0	N20	Evo	0.74978	0.5638
C0	N20	Evo	0.721275	0.5576
C0	N20	Evo	0.776574	0.542
C0	N20	Evo	0.74291	0.5466
C0	N20	Evo	0.780092	0.5436
C0	N20	Evo	0.785911	0.547
C0	N20	Evo	0.795316	0.5478
C0	N20	Evo	0.758848	0.5492
C0	N20	Evo	0.716704	0.552
C0	N20	Evo	0.697877	0.5578
C0	N20	Evo	0.728036	0.5446
C0	N20	Evo	0.76764	0.5418
C0	N20	Evo	0.694599	0.5526
C0	N20	Evo	0.654302	0.5488
C0	N20	Evo	0.657452	0.5682
C0	N20	Evo	0.748721	0.5598
C0	N20	Evo	0.693028	0.5732
C0	N20	Evo	0.755609	0.5702
C0	N20	Evo	0.705955	0.568
C0	N20	Evo	0.706197	0.5518
C0	N20	Evo	0.716704	0.5738
C0	N20	Evo	0.72982	0.572
C0	N20	Evo	0.821649	0.5656
C0	N20	Evo	0.652567	0.5668
C0	N20	Evo	0.776242	0.5718
C0	N20	Evo	0.769808	0.5688
C0	N20	Evo	0.653652	0.5428
C0	N20	Evo	0.787776	0.5632
C0	N20	Evo	0.753092	0.5798
C0	N20	Evo	0.780264	0.5314
C0	N20	Evo	0.731028	0.5578
C0	N20	Evo	0.73622	0.555
C1	N20	Evo	0.792401	0.2336
C1	N20	Evo	0.738331	0.2524
C1	N20	Evo	0.748721	0.2
C1	N20	Evo	0.763817	0.23
C1	N20	Evo	0.748721	0.2268
C1	N20	Evo	0.748721	0.2166
C10	N20	Evo	0.716704	0.4108
C10	N20	Evo	0.752714	0.3906
C10	N20	Evo	0.761695	0.3982
C10	N20	Evo	0.753356	0.3968
C10	N20	Evo	0.754828	0.4038
C10	N20	Evo	0.764522	0.407
C11	N20	Evo	0.69546	0.5844
C11	N20	Evo	0.626254	0.5602
C11	N20	Evo	0.66557	0.5566
C11	N20	Evo	0.716704	0.558
C11	N20	Evo	0.628959	0.5632
C11	N20	Evo	0.618144	0.5524
C12	N20	Evo	0.687914	0.4258
C12	N20	Evo	0.688265	0.4172
C12	N20	Evo	0.698519	0.4228
C12	N20	Evo	0.681899	0.4224
C12	N20	Evo	0.656891	0.397
C12	N20	Evo	0.669591	0.4108
C13	N20	Evo	0.324372	0.1332
C13	N20	Evo	0.51459	0.185
C13	N20	Evo	0.366516	0.092
C13	N20	Evo	0.477569	0.1566
C13	N20	Evo	0.501105	0.162
C13	N20	Evo	0.341396	0.1022
C14	N20	Evo	0.481589	0.1478
C14	N20	Evo	0.525934	0.1744
C14	N20	Evo	0.669591	0.1568
C14	N20	Evo	0.669591	0.1718
C14	N20	Evo	0.748721	0.1262
C14	N20	Evo	0.61837	0.2068
C15	N20	Evo	0.722543	0.2236
C15	N20	Evo	0.77329	0.2126
C15	N20	Evo	0.750639	0.2264
C15	N20	Evo	0.734684	0.2116
C15	N20	Evo	0.724704	0.222
C15	N20	Evo	0.784842	0.2142
C16	N20	Evo	0.738988	0.6012
C16	N20	Evo	0.753653	0.597
C16	N20	Evo	0.780146	0.593
C16	N20	Evo	0.749859	0.6546
C16	N20	Evo	0.815838	0.594
C16	N20	Evo	0.616178	0.668
C17	N20	Evo	0.721799	0.1346
C17	N20	Evo	0.755261	0.1552
C17	N20	Evo	0.760583	0.1218
C17	N20	Evo	0.764955	0.1338
C17	N20	Evo	0.807026	0.1344
C17	N20	Evo	0.741557	0.1502
C18	N20	Evo	0.751081	0.4458
C18	N20	Evo	0.79346	0.4314
C18	N20	Evo	0.810381	0.4366
C18	N20	Evo	0.802748	0.464
C18	N20	Evo	0.812573	0.4542
C18	N20	Evo	0.726831	0.4542
C19	N20	Evo	0.522863	0.6216
C19	N20	Evo	0.569243	0.6608
C19	N20	Evo	0.540957	0.4626
C19	N20	Evo	0.601631	0.5256
C19	N20	Evo	0.549486	0.5732
C19	N20	Evo	0.514484	0.468
C2	N20	Evo	0.73209	0.3266
C2	N20	Evo	0.793211	0.2776
C2	N20	Evo	0.786223	0.2764
C2	N20	Evo	0.959158	0.3304
C2	N20	Evo	0.741224	0.2686
C2	N20	Evo	0.743727	0.2964
C20	N20	Evo	0.261571	0.1246
C20	N20	Evo	0.312063	0.1224
C20	N20	Evo	0.261571	0.1486
C20	N20	Evo	0.262712	0.1218
C20	N20	Evo	0.260235	0.1656
C20	N20	Evo	0.239135	0.1412
C21	N20	Evo	0.484436	0.5816
C21	N20	Evo	0.450405	0.5488
C21	N20	Evo	0.448536	0.5618
C21	N20	Evo	0.478096	0.5452
C21	N20	Evo	0.49773	0.6102
C21	N20	Evo	0.448857	0.5748
C22	N20	Evo	0.464298	0.5784
C22	N20	Evo	0.528702	0.588
C22	N20	Evo	0.527296	0.6132
C22	N20	Evo	0.522863	0.597
C22	N20	Evo	0.505973	0.5838
C22	N20	Evo	0.481589	0.5808
C23	N20	Evo	0.835604	0.5454
C23	N20	Evo	0.799238	0.539
C23	N20	Evo	0.768301	0.5244
C23	N20	Evo	0.768301	0.531
C23	N20	Evo	0.773766	0.536
C23	N20	Evo	0.758848	0.549
C24	N20	Evo	0.600095	0.5146
C24	N20	Evo	0.705435	0.5172
C24	N20	Evo	0.748721	0.496
C24	N20	Evo	0.733033	0.4966
C24	N20	Evo	0.733033	0.5098
C24	N20	Evo	0.403384	0.536
C25	N20	Evo	0.614494	0.1358
C25	N20	Evo	0.594154	0.1396
C25	N20	Evo	0.616178	0.1296
C25	N20	Evo	0.626254	0.1286
C25	N20	Evo	0.671058	0.1304
C25	N20	Evo	0.690204	0.13
C26	N20	Evo	0.782034	0.1916
C26	N20	Evo	0.822138	0.1894
C26	N20	Evo	0.854904	0.1926
C26	N20	Evo	0.848105	0.1932
C26	N20	Evo	0.753092	0.2002
C26	N20	Evo	0.804689	0.188
C27	N20	Evo	0.876342	0.4774
C27	N20	Evo	0.898598	0.4796
C27	N20	Evo	0.909973	0.4826
C27	N20	Evo	0.818216	0.5266
C27	N20	Evo	0.846372	0.4864
C27	N20	Evo	0.862393	0.4872
C28	N20	Evo	0.512374	0.485
C28	N20	Evo	0.512374	0.4776
C28	N20	Evo	0.481589	0.4788
C28	N20	Evo	0.439445	0.486
C28	N20	Evo	0.377785	0.518
C28	N20	Evo	0.40464	0.463
C3	N20	Evo	0.741712	0.568
C3	N20	Evo	0.810239	0.5692
C3	N20	Evo	0.779948	0.5616
C3	N20	Evo	0.815838	0.5732
C3	N20	Evo	0.761961	0.5744
C3	N20	Evo	0.8051	0.559
C4	N20	Evo	0.398788	0.7058
C4	N20	Evo	0.410861	0.7096
C4	N20	Evo	0.413737	0.702
C4	N20	Evo	0.431921	0.7114
C4	N20	Evo	0.412687	0.722
C4	N20	Evo	0.430749	0.7086
C5	N20	Evo	0.69968	0.5408
C5	N20	Evo	0.811259	0.5354
C5	N20	Evo	0.789632	0.5292
C5	N20	Evo	0.831777	0.541
C5	N20	Evo	0.819468	0.5256
C5	N20	Evo	0.831777	0.5356
C6	N20	Evo	0.750767	0.5426
C6	N20	Evo	0.78844	0.5418
C6	N20	Evo	0.739056	0.5382
C6	N20	Evo	0.788097	0.5414
C6	N20	Evo	0.720291	0.5496
C6	N20	Evo	0.7804	0.5314
C7	N20	Evo	0.669591	0.5634
C7	N20	Evo	0.637573	0.5596
C7	N20	Evo	0.69968	0.5512
C7	N20	Evo	0.728299	0.5616
C7	N20	Evo	0.683809	0.565
C7	N20	Evo	0.670304	0.5568
C8	N20	Evo	0.794366	0.5812
C8	N20	Evo	0.831777	0.588
C8	N20	Evo	0.814753	0.5692
C8	N20	Evo	0.792401	0.538
C8	N20	Evo	0.733033	0.4782
C8	N20	Evo	0.703143	0.5818
C9	N20	Evo	0.718782	0.4724
C9	N20	Evo	0.733033	0.4108
C9	N20	Evo	0.766279	0.407
C9	N20	Evo	0.763817	0.402
C9	N20	Evo	0.793	0.4044
C9	N20	Evo	0.778364	0.4366
C0	N28	Anc	0.501105	0.7608
C0	N28	Anc	0.528702	0.748
C0	N28	Anc	0.458053	0.728
C0	N28	Anc	0.455774	0.712
C0	N28	Anc	0.475834	0.7132
C0	N28	Anc	0.601631	0.7334
C0	N28	Anc	0.537494	0.6988
C0	N28	Anc	0.439445	0.6878
C0	N28	Anc	0.515142	0.6806
C0	N28	Anc	0.458053	0.6768
C0	N28	Anc	0.439445	0.6788
C0	N28	Anc	0.428177	0.6938
C0	N28	Anc	0.634313	0.7256
C0	N28	Anc	0.375308	0.709
C0	N28	Anc	0.419929	0.7148
C0	N28	Anc	0.481589	0.695
C0	N28	Anc	0.481589	0.6874
C0	N28	Anc	0.392332	0.7454
C0	N28	Anc	0.366516	0.7118
C0	N28	Anc	0.384564	0.6974
C0	N28	Anc	0.401321	0.687
C0	N28	Anc	0.40464	0.6986
C0	N28	Anc	0.40866	0.6672
C0	N28	Anc	0.366516	0.707
C0	N28	Anc	0.517107	0.7024
C0	N28	Anc	0.575392	0.6944
C0	N28	Anc	0.501105	0.6712
C0	N28	Anc	0.537494	0.729
C0	N28	Anc	0.616178	0.6888
C0	N28	Anc	0.554518	0.7074
C0	N28	Anc	0	0.001
C0	N28	Anc	0	0
C0	N28	Anc	0	0
C0	N28	Anc	0	0.002
C0	N28	Anc	0	0
C0	N28	Anc	0	0.003
C0	N28	Anc	0.519713	0.7066
C0	N28	Anc	0.439445	0.6978
C0	N28	Anc	0.397301	0.7058
C0	N28	Anc	0.486558	0.689
C0	N28	Anc	0.40464	0.6928
C0	N28	Anc	0.366516	0.7132
C1	N28	Anc	0.360315	0.2168
C1	N28	Anc	0.317972	0.2128
C1	N28	Anc	0.397301	0.2146
C1	N28	Anc	0.461072	0.2098
C1	N28	Anc	0.554518	0.2078
C1	N28	Anc	0.428177	0.197
C10	N28	Anc	0.509186	0.7258
C10	N28	Anc	0.439445	0.705
C10	N28	Anc	0.439445	0.6872
C10	N28	Anc	0.358435	0.689
C10	N28	Anc	0.528702	0.7072
C10	N28	Anc	0.480337	0.7368
C11	N28	Anc	0.475834	0.6972
C11	N28	Anc	0.458053	0.747
C11	N28	Anc	0.481589	0.704
C11	N28	Anc	0.481589	0.6698
C11	N28	Anc	0.40866	0.7538
C11	N28	Anc	0.348331	0.7184
C12	N28	Anc	0.507405	0.5102
C12	N28	Anc	0.524875	0.527
C12	N28	Anc	0.501105	0.5196
C12	N28	Anc	0.554518	0.5362
C12	N28	Anc	0.429055	0.5218
C12	N28	Anc	0.386032	0.539
C13	N28	Anc	0	0.0084
C13	N28	Anc	0	0.0074
C13	N28	Anc	0	0.0078
C13	N28	Anc	0	0.005
C13	N28	Anc	0	0.009
C13	N28	Anc	0.247616	0.0102
C14	N28	Anc	0	0.007
C14	N28	Anc	0	0.0078
C14	N28	Anc	0	0.0074
C14	N28	Anc	0	0.0078
C14	N28	Anc	0	0.0078
C14	N28	Anc	0	0.0084
C15	N28	Anc	0.399412	0.3616
C15	N28	Anc	0.490892	0.3204
C15	N28	Anc	0.481589	0.3006
C15	N28	Anc	0.616178	0.2874
C15	N28	Anc	0.462981	0.2602
C15	N28	Anc	0.350187	0.2918
C16	N28	Anc	0.439445	0.0306
C16	N28	Anc	0.439445	0.0296
C16	N28	Anc	0.366516	0.0258
C16	N28	Anc	0.315383	0.0296
C16	N28	Anc	0.296775	0.0294
C16	N28	Anc	0.357527	0.016
C17	N28	Anc	0.800592	0.2486
C17	N28	Anc	0.672703	0.2038
C17	N28	Anc	0.605651	0.1794
C17	N28	Anc	0.681899	0.2098
C17	N28	Anc	0.753092	0.3328
C17	N28	Anc	0.67456	0.2542
C18	N28	Anc	0.496685	0.7806
C18	N28	Anc	0.510517	0.7424
C18	N28	Anc	0.554518	0.7134
C18	N28	Anc	0.733033	0.7696
C18	N28	Anc	0.748721	0.8648
C18	N28	Anc	0.789632	0.7682
C19	N28	Anc	0.439445	0.543
C19	N28	Anc	0.453992	0.5556
C19	N28	Anc	0.424349	0.5234
C19	N28	Anc	0.554518	0.5802
C19	N28	Anc	0.468029	0.547
C19	N28	Anc	0.439445	0.5496
C2	N28	Anc	0.41363	0.3616
C2	N28	Anc	0.519713	0.3456
C2	N28	Anc	0.716704	0.3356
C2	N28	Anc	0.519713	0.3458
C2	N28	Anc	0.643775	0.3138
C2	N28	Anc	0.481589	0.3308
C20	N28	Anc	0	-0.001
C20	N28	Anc	0	-0.002
C20	N28	Anc	0	0
C20	N28	Anc	0	0.001
C20	N28	Anc	0	0
C20	N28	Anc	0	-0.0002
C21	N28	Anc	0	-0.001
C21	N28	Anc	0	0.001
C21	N28	Anc	0	0
C21	N28	Anc	0	-0.002
C21	N28	Anc	0	-0.001
C21	N28	Anc	0	-0.001
C22	N28	Anc	0	0.001
C22	N28	Anc	0	0.001
C22	N28	Anc	0	0
C22	N28	Anc	0	0.0012
C22	N28	Anc	0	-0.001
C22	N28	Anc	0	0.0044
C23	N28	Anc	0.488963	0.7114
C23	N28	Anc	0.650479	0.7006
C23	N28	Anc	0.601631	0.6802
C23	N28	Anc	0.583594	0.6666
C23	N28	Anc	0.464298	0.6626
C23	N28	Anc	0.432887	0.6892
C24	N28	Anc	0.471462	0.7392
C24	N28	Anc	0.512374	0.6352
C24	N28	Anc	0.46526	0.6388
C24	N28	Anc	0.554518	0.6216
C24	N28	Anc	0.468029	0.635
C24	N28	Anc	0.601631	0.6682
C25	N28	Anc	0.38391	0.1712
C25	N28	Anc	0.402209	0.1692
C25	N28	Anc	0.42126	0.1662
C25	N28	Anc	0.439445	0.1654
C25	N28	Anc	0.315383	0.1664
C25	N28	Anc	0.448857	0.1696
C26	N28	Anc	0.453239	0.2608
C26	N28	Anc	0.501105	0.258
C26	N28	Anc	0.469088	0.2494
C26	N28	Anc	0.59163	0.2502
C26	N28	Anc	0.581373	0.25
C26	N28	Anc	0.476855	0.2566
C27	N28	Anc	0.546751	0.613
C27	N28	Anc	0.562137	0.5906
C27	N28	Anc	0.501105	0.6344
C27	N28	Anc	0.814753	0.6128
C27	N28	Anc	0.667083	0.6432
C27	N28	Anc	0.539971	0.6428
C28	N28	Anc	0	-0.001
C28	N28	Anc	0	-0.002
C28	N28	Anc	0	-0.002
C28	N28	Anc	0	-0.002
C28	N28	Anc	0	0.0002
C28	N28	Anc	0	-0.001
C3	N28	Anc	0.337819	0.7256
C3	N28	Anc	0.350187	0.709
C3	N28	Anc	0.340548	0.7148
C3	N28	Anc	0.382205	0.695
C3	N28	Anc	0.350828	0.6874
C3	N28	Anc	0.364224	0.7454
C4	N28	Anc	0.318713	0.7772
C4	N28	Anc	0.307952	0.784
C4	N28	Anc	0.325902	0.792
C4	N28	Anc	0.302361	0.7682
C4	N28	Anc	0.328059	0.7396
C4	N28	Anc	0.346467	0.6988
C5	N28	Anc	0.455774	0.706
C5	N28	Anc	0.397301	0.6662
C5	N28	Anc	0.439445	0.6516
C5	N28	Anc	0.455774	0.6782
C5	N28	Anc	0.601631	0.6766
C5	N28	Anc	0.439445	0.7062
C6	N28	Anc	0.382205	0.6862
C6	N28	Anc	0.439445	0.663
C6	N28	Anc	0.471462	0.684
C6	N28	Anc	0.439445	0.674
C6	N28	Anc	0.419929	0.6518
C6	N28	Anc	0.475834	0.7154
C7	N28	Anc	0.333164	0.7322
C7	N28	Anc	0.359177	0.7378
C7	N28	Anc	0.418387	0.7316
C7	N28	Anc	0.481589	0.7228
C7	N28	Anc	0.380624	0.7328
C7	N28	Anc	0.40866	0.724
C8	N28	Anc	0.439445	0.7518
C8	N28	Anc	0.389999	0.7742
C8	N28	Anc	0.348558	0.8202
C8	N28	Anc	0.409987	0.8244
C8	N28	Anc	0.378953	0.8344
C8	N28	Anc	0.277259	0.7712
C9	N28	Anc	0.357527	0.0324
C9	N28	Anc	0.392332	0.0344
C9	N28	Anc	0.315383	0.0356
C9	N28	Anc	0.475834	0.031
C9	N28	Anc	0.173146	0.0366
C9	N28	Anc	0.519713	0.0324
C0	N28	Evo	0.742519	0.6298
C0	N28	Evo	0.778364	0.626
C0	N28	Evo	0.792401	0.6224
C0	N28	Evo	0.778364	0.6206
C0	N28	Evo	0.778364	0.6208
C0	N28	Evo	0.778364	0.6164
C0	N28	Evo	0.762468	0.631
C0	N28	Evo	0.857982	0.6292
C0	N28	Evo	0.727663	0.6266
C0	N28	Evo	0.782425	0.6272
C0	N28	Evo	0.804689	0.624
C0	N28	Evo	0.734484	0.6212
C0	N28	Evo	0.873295	0.6082
C0	N28	Evo	0.826745	0.6092
C0	N28	Evo	0.816488	0.6096
C0	N28	Evo	0.821649	0.6034
C0	N28	Evo	0.903253	0.601
C0	N28	Evo	0.808913	0.6108
C0	N28	Evo	0.783098	0.6094
C0	N28	Evo	0.835922	0.6052
C0	N28	Evo	0.810381	0.6056
C0	N28	Evo	0.796972	0.6054
C0	N28	Evo	0.726116	0.6054
C0	N28	Evo	0.778364	0.6036
C0	N28	Evo	0.672214	0.5898
C0	N28	Evo	0.79515	0.5966
C0	N28	Evo	0.856026	0.5766
C0	N28	Evo	0.808007	0.647
C0	N28	Evo	0.724952	0.6022
C0	N28	Evo	0.701608	0.5794
C0	N28	Evo	0.77332	0.6206
C0	N28	Evo	0.871413	0.6156
C0	N28	Evo	0.87889	0.6098
C0	N28	Evo	0.781711	0.614
C0	N28	Evo	0.794827	0.6156
C0	N28	Evo	0.734806	0.6158
C0	N28	Evo	0.807735	0.602
C0	N28	Evo	0.784663	0.5982
C0	N28	Evo	0.696186	0.6
C0	N28	Evo	0.845813	0.6052
C0	N28	Evo	0.87889	0.5962
C0	N28	Evo	0.713356	0.6092
C1	N28	Evo	0.814753	0.2352
C1	N28	Evo	0.785911	0.1982
C1	N28	Evo	0.690204	0.24
C1	N28	Evo	0.831777	0.2766
C1	N28	Evo	0.93415	0.2086
C1	N28	Evo	0.831777	0.203
C10	N28	Evo	0.725381	0.381
C10	N28	Evo	0.722221	0.38
C10	N28	Evo	0.75135	0.3724
C10	N28	Evo	0.811259	0.3678
C10	N28	Evo	0.867621	0.3704
C10	N28	Evo	0.802133	0.3746
C11	N28	Evo	0.840024	0.6304
C11	N28	Evo	0.823355	0.6292
C11	N28	Evo	0.896284	0.6256
C11	N28	Evo	0.823355	0.6278
C11	N28	Evo	0.946849	0.624
C11	N28	Evo	0.831777	0.633
C12	N28	Evo	0.754828	0.4456
C12	N28	Evo	0.754828	0.4236
C12	N28	Evo	0.754828	0.4296
C12	N28	Evo	0.844085	0.4208
C12	N28	Evo	0.754828	0.4256
C12	N28	Evo	0.761695	0.436
C13	N28	Evo	0.471462	0.083
C13	N28	Evo	0.495876	0.0812
C13	N28	Evo	0.523333	0.0806
C13	N28	Evo	0.554518	0.0808
C13	N28	Evo	0.554518	0.0802
C13	N28	Evo	0.574034	0.0798
C14	N28	Evo	0.748721	0.1284
C14	N28	Evo	0.681899	0.1236
C14	N28	Evo	0.574034	0.1226
C14	N28	Evo	0.716704	0.0876
C14	N28	Evo	0.748721	0.093
C14	N28	Evo	0.748721	0.0946
C15	N28	Evo	0.692156	0.316
C15	N28	Evo	0.815838	0.3446
C15	N28	Evo	0.788621	0.337
C15	N28	Evo	0.87889	0.324
C15	N28	Evo	0.826745	0.3252
C15	N28	Evo	0.740541	0.2842
C16	N28	Evo	0.82482	0.7164
C16	N28	Evo	0.787776	0.7206
C16	N28	Evo	0.778364	0.721
C16	N28	Evo	0.639041	0.7238
C16	N28	Evo	0.695077	0.7224
C16	N28	Evo	0.778364	0.7214
C17	N28	Evo	0.831777	0.637
C17	N28	Evo	0.794366	0.6412
C17	N28	Evo	0.856026	0.6348
C17	N28	Evo	0.778364	0.6172
C17	N28	Evo	0.840024	0.6318
C17	N28	Evo	0.844085	0.6198
C18	N28	Evo	0.688265	0.557
C18	N28	Evo	0.69384	0.5112
C18	N28	Evo	0.819077	0.4944
C18	N28	Evo	0.722719	0.5004
C18	N28	Evo	0.69968	0.4936
C18	N28	Evo	0.778364	0.5324
C19	N28	Evo	0.373128	0.215
C19	N28	Evo	0.366516	0.2672
C19	N28	Evo	0.386032	0.2518
C19	N28	Evo	0.481589	0.1978
C19	N28	Evo	0.362283	0.197
C19	N28	Evo	0.382205	0.2022
C2	N28	Evo	0.828189	0.3072
C2	N28	Evo	0.772609	0.3112
C2	N28	Evo	0.814753	0.3034
C2	N28	Evo	0.752549	0.3326
C2	N28	Evo	0.774536	0.3156
C2	N28	Evo	0.740954	0.311
C20	N28	Evo	0.547795	0.4202
C20	N28	Evo	0.61837	0.3986
C20	N28	Evo	0.666003	0.3866
C20	N28	Evo	0.530748	0.3958
C20	N28	Evo	0.570847	0.4134
C20	N28	Evo	0.53647	0.3904
C21	N28	Evo	0.851293	0.6376
C21	N28	Evo	0.778364	0.6346
C21	N28	Evo	0.900517	0.6352
C21	N28	Evo	0.824205	0.6292
C21	N28	Evo	0.859374	0.633
C21	N28	Evo	0.859374	0.6398
C22	N28	Evo	0.708282	0.6092
C22	N28	Evo	0.757417	0.6084
C22	N28	Evo	0.801728	0.605
C22	N28	Evo	0.757417	0.6024
C22	N28	Evo	0.753092	0.6058
C22	N28	Evo	0.795571	0.6062
C23	N28	Evo	0.766279	0.6394
C23	N28	Evo	0.778364	0.634
C23	N28	Evo	0.831777	0.626
C23	N28	Evo	0.734484	0.6314
C23	N28	Evo	0.741327	0.6276
C23	N28	Evo	0.704004	0.6278
C24	N28	Evo	0.796972	0.5502
C24	N28	Evo	0.900517	0.5512
C24	N28	Evo	0.900517	0.5448
C24	N28	Evo	0.69968	0.539
C24	N28	Evo	0.796972	0.535
C24	N28	Evo	0.677328	0.5402
C25	N28	Evo	0.630215	0.1976
C25	N28	Evo	0.608971	0.194
C25	N28	Evo	0.623258	0.2034
C25	N28	Evo	0.523969	0.1888
C25	N28	Evo	0.616178	0.196
C25	N28	Evo	0.716704	0.1738
C26	N28	Evo	0.800307	0.2998
C26	N28	Evo	0.595231	0.3128
C26	N28	Evo	0.792401	0.311
C26	N28	Evo	0.707715	0.3132
C26	N28	Evo	0.778364	0.3318
C26	N28	Evo	0.679981	0.337
C27	N28	Evo	0.758848	0.5646
C27	N28	Evo	0.852651	0.5674
C27	N28	Evo	0.785444	0.5802
C27	N28	Evo	0.900517	0.5796
C27	N28	Evo	0.851293	0.5888
C27	N28	Evo	0.990022	0.6214
C28	N28	Evo	0.67667	0.5632
C28	N28	Evo	0.763817	0.552
C28	N28	Evo	0.653652	0.5646
C28	N28	Evo	0.653652	0.5598
C28	N28	Evo	0.643775	0.5742
C28	N28	Evo	0.67667	0.5522
C3	N28	Evo	0.909194	0.6474
C3	N28	Evo	0.910223	0.6394
C3	N28	Evo	0.773135	0.6346
C3	N28	Evo	0.757026	0.6368
C3	N28	Evo	0.921034	0.6348
C3	N28	Evo	0.507645	0.6486
C4	N28	Evo	0.524875	0.6506
C4	N28	Evo	0.53189	0.6484
C4	N28	Evo	0.510944	0.6672
C4	N28	Evo	0.495504	0.667
C4	N28	Evo	0.508253	0.646
C4	N28	Evo	0.748721	0.6426
C5	N28	Evo	0.771584	0.6052
C5	N28	Evo	0.822854	0.6056
C5	N28	Evo	0.775177	0.6054
C5	N28	Evo	0.807527	0.5988
C5	N28	Evo	0.821649	0.5966
C5	N28	Evo	0.848105	0.595
C6	N28	Evo	0.738331	0.605
C6	N28	Evo	0.816488	0.606
C6	N28	Evo	0.825851	0.6112
C6	N28	Evo	0.731251	0.5994
C6	N28	Evo	0.781711	0.5952
C6	N28	Evo	0.748721	0.5956
C7	N28	Evo	0.772609	0.6292
C7	N28	Evo	0.831777	0.609
C7	N28	Evo	0.805961	0.6088
C7	N28	Evo	0.766769	0.6098
C7	N28	Evo	0.745914	0.613
C7	N28	Evo	0.772609	0.609
C8	N28	Evo	0.770116	0.6156
C8	N28	Evo	0.831777	0.6106
C8	N28	Evo	0.805961	0.6176
C8	N28	Evo	0.692454	0.6108
C8	N28	Evo	0.669591	0.612
C8	N28	Evo	0.690888	0.6124
C9	N28	Evo	0.703143	0.052
C9	N28	Evo	0.703143	0.051
C9	N28	Evo	0.778364	0.051
C9	N28	Evo	0.703143	0.051
C9	N28	Evo	0.69384	0.0502
C9	N28	Evo	0.748721	0.05
C0	N7	Anc	0.652567	0.778
C0	N7	Anc	0.669591	0.7838
C0	N7	Anc	0.652567	0.7598
C0	N7	Anc	0.623771	0.8052
C0	N7	Anc	0.653652	0.8026
C0	N7	Anc	0.609879	0.7908
C0	N7	Anc	0.635694	0.7462
C0	N7	Anc	0.632964	0.7384
C0	N7	Anc	0.643775	0.7356
C0	N7	Anc	0.649882	0.7576
C0	N7	Anc	0.587717	0.786
C0	N7	Anc	0.637573	0.7398
C0	N7	Anc	0.846372	0.644
C0	N7	Anc	0.822929	0.6408
C0	N7	Anc	0.81595	0.642
C0	N7	Anc	0.838856	0.6488
C0	N7	Anc	0.775291	0.6494
C0	N7	Anc	0.693396	0.6754
C0	N7	Anc	0.762035	0.6874
C0	N7	Anc	0.707912	0.703
C0	N7	Anc	0.800592	0.6714
C0	N7	Anc	0.83581	0.6792
C0	N7	Anc	0.806722	0.6704
C0	N7	Anc	0.746833	0.6864
C0	N7	Anc	0.765928	0.6776
C0	N7	Anc	0.751427	0.68
C0	N7	Anc	0.789391	0.6592
C0	N7	Anc	0.759313	0.6902
C0	N7	Anc	0.763596	0.665
C0	N7	Anc	0.665665	0.6776
C0	N7	Anc	0.84379	0.6606
C0	N7	Anc	0.767329	0.6776
C0	N7	Anc	0.789434	0.688
C0	N7	Anc	0.780953	0.6698
C0	N7	Anc	0.711202	0.7088
C0	N7	Anc	0.705041	0.7186
C0	N7	Anc	0.86159	0.6628
C0	N7	Anc	0.778364	0.6758
C0	N7	Anc	0.744785	0.6942
C0	N7	Anc	0.706036	0.713
C0	N7	Anc	0.688027	0.6856
C0	N7	Anc	0.683351	0.708
C0	N7	Anc	0.713116	0.6982
C0	N7	Anc	0.711735	0.7146
C0	N7	Anc	0.660044	0.7256
C0	N7	Anc	0.746907	0.6884
C0	N7	Anc	0.709227	0.708
C0	N7	Anc	0.679092	0.7006
C1	N7	Anc	0	-0.0012
C1	N7	Anc	0	0
C1	N7	Anc	0	0
C1	N7	Anc	0	-0.001
C1	N7	Anc	0	0
C1	N7	Anc	0	0
C10	N7	Anc	0.837732	0.3802
C10	N7	Anc	0.744136	0.386
C10	N7	Anc	0.782736	0.3814
C10	N7	Anc	0.67456	0.3936
C10	N7	Anc	0.790051	0.3832
C10	N7	Anc	0.673736	0.388
C11	N7	Anc	0.780118	0.7376
C11	N7	Anc	0.666151	0.8402
C11	N7	Anc	0.708783	0.7434
C11	N7	Anc	0.787586	0.7368
C11	N7	Anc	0.758448	0.747
C11	N7	Anc	0.746252	0.7444
C12	N7	Anc	0.691696	0.7802
C12	N7	Anc	0.778364	0.6658
C12	N7	Anc	0.745914	0.6768
C12	N7	Anc	0.738331	0.6826
C12	N7	Anc	0.716704	0.6666
C12	N7	Anc	0.738331	0.6602
C13	N7	Anc	0.537494	0.075
C13	N7	Anc	0.519713	0.0698
C13	N7	Anc	0.531654	0.0736
C13	N7	Anc	0.554518	0.0744
C13	N7	Anc	0.447693	0.1372
C13	N7	Anc	0.531654	0.0802
C14	N7	Anc	0.496177	0.156
C14	N7	Anc	0.435724	0.1626
C14	N7	Anc	0.399412	0.1044
C14	N7	Anc	0.545529	0.1742
C14	N7	Anc	0.442607	0.1108
C14	N7	Anc	0.486558	0.1124
C15	N7	Anc	0.780203	0.4044
C15	N7	Anc	0.748721	0.3956
C15	N7	Anc	0.67858	0.311
C15	N7	Anc	0.712234	0.3394
C15	N7	Anc	0.696599	0.2806
C15	N7	Anc	0.711913	0.2786
C16	N7	Anc	0.69968	0.7608
C16	N7	Anc	0.643775	0.7516
C16	N7	Anc	0.762238	0.7378
C16	N7	Anc	0.601631	0.825
C16	N7	Anc	0.635694	0.7712
C16	N7	Anc	0.60793	0.771
C17	N7	Anc	0.701608	0.1622
C17	N7	Anc	0.685191	0.1708
C17	N7	Anc	0.850559	0.2262
C17	N7	Anc	0.724043	0.3148
C17	N7	Anc	0.716704	0.2502
C17	N7	Anc	0.696186	0.2536
C17	N7	Anc	0.828882	0.68
C17	N7	Anc	0.830493	0.631
C17	N7	Anc	0.810719	0.6524
C17	N7	Anc	0.677838	0.7566
C17	N7	Anc	0.709227	0.7218
C17	N7	Anc	0.69384	0.6782
C18	N7	Anc	0.701608	1.107
C18	N7	Anc	0.836197	0.7322
C18	N7	Anc	0.755759	0.6064
C18	N7	Anc	0.721799	0.6168
C18	N7	Anc	0.805961	0.58
C18	N7	Anc	0.761695	0.847
C18	N7	Anc	0.800958	0.7302
C18	N7	Anc	0.819077	0.6476
C18	N7	Anc	0.805961	0.6414
C18	N7	Anc	0.748721	0.7138
C18	N7	Anc	0.659463	0.8354
C18	N7	Anc	0.664242	0.6458
C19	N7	Anc	0.643775	0.6092
C19	N7	Anc	0.616178	0.611
C19	N7	Anc	0.689107	0.636
C19	N7	Anc	0.616178	0.6316
C19	N7	Anc	0.643775	0.6104
C19	N7	Anc	0.595231	0.5696
C19	N7	Anc	0.689107	0.6086
C19	N7	Anc	0.689107	0.605
C19	N7	Anc	0.669591	0.5866
C19	N7	Anc	0.703143	0.593
C19	N7	Anc	0.703143	0.5888
C19	N7	Anc	0.689107	0.5828
C2	N7	Anc	0.663291	0.3408
C2	N7	Anc	0.720849	0.3342
C2	N7	Anc	0.748721	0.3654
C2	N7	Anc	0.703143	0.3258
C2	N7	Anc	0.698096	0.3504
C2	N7	Anc	0.751388	0.3492
C20	N7	Anc	0.53591	0.5964
C20	N7	Anc	0.554518	0.5598
C20	N7	Anc	0.570847	0.5688
C20	N7	Anc	0.471462	0.5956
C20	N7	Anc	0.643775	0.6112
C20	N7	Anc	0.592642	0.5462
C20	N7	Anc	0.492857	0.608
C20	N7	Anc	0.534	0.602
C20	N7	Anc	0.468029	0.6596
C20	N7	Anc	0.570847	0.6438
C20	N7	Anc	0.38391	0.5882
C20	N7	Anc	0.519713	0.5662
C21	N7	Anc	0.506973	0.7254
C21	N7	Anc	0.488847	0.8002
C21	N7	Anc	0.533695	0.3848
C21	N7	Anc	0.563785	0.8018
C21	N7	Anc	0.547479	0.7416
C21	N7	Anc	0.476051	0.748
C22	N7	Anc	0.501866	0.7566
C22	N7	Anc	0.513273	0.7428
C22	N7	Anc	0.524469	0.7828
C22	N7	Anc	0.533522	0.84
C22	N7	Anc	0.557951	0.8366
C22	N7	Anc	0.516394	0.7564
C23	N7	Anc	0.591992	0.771
C23	N7	Anc	0.643775	0.7894
C23	N7	Anc	0.625058	0.815
C23	N7	Anc	0.596925	0.785
C23	N7	Anc	0.584161	0.7732
C23	N7	Anc	0.618767	0.8098
C24	N7	Anc	0.67667	0.7552
C24	N7	Anc	0.667083	0.7388
C24	N7	Anc	0.67456	0.8414
C24	N7	Anc	0.621852	0.9046
C24	N7	Anc	0.63218	0.8626
C24	N7	Anc	0.623258	0.7376
C25	N7	Anc	0.682937	0.1706
C25	N7	Anc	0.649731	0.1884
C25	N7	Anc	0.578768	0.1782
C25	N7	Anc	0.664833	0.1724
C25	N7	Anc	0.635412	0.1736
C25	N7	Anc	0.516793	0.1772
C26	N7	Anc	0.778364	0.259
C26	N7	Anc	0.778364	0.2524
C26	N7	Anc	0.667258	0.2492
C26	N7	Anc	0.631834	0.2602
C26	N7	Anc	0.677598	0.248
C26	N7	Anc	0.613572	0.2648
C27	N7	Anc	0.778364	0.6334
C27	N7	Anc	0.753092	0.6212
C27	N7	Anc	0.821109	0.6314
C27	N7	Anc	0.810043	0.5714
C27	N7	Anc	0.727663	0.5958
C27	N7	Anc	0.758848	0.6608
C28	N7	Anc	0.446402	0.7778
C28	N7	Anc	0.46526	0.7302
C28	N7	Anc	0.407695	0.7808
C28	N7	Anc	0.446057	0.7532
C28	N7	Anc	0.436258	0.7192
C28	N7	Anc	0.480158	0.78
C3	N7	Anc	0.77722	0.8184
C3	N7	Anc	0.809892	0.7764
C3	N7	Anc	0.778364	0.8366
C3	N7	Anc	0.764596	0.7426
C3	N7	Anc	0.761531	0.9026
C3	N7	Anc	0.701127	0.8488
C4	N7	Anc	0.381242	0.8576
C4	N7	Anc	0.374036	0.88
C4	N7	Anc	0.376057	0.874
C4	N7	Anc	0.37219	0.8752
C4	N7	Anc	0.389944	0.8638
C4	N7	Anc	0.379547	0.882
C5	N7	Anc	0.696446	0.6582
C5	N7	Anc	0.790641	0.6542
C5	N7	Anc	0.680164	0.6316
C5	N7	Anc	0.763172	0.6538
C5	N7	Anc	0.73622	0.6662
C5	N7	Anc	0.650983	0.703
C6	N7	Anc	0.761255	0.6642
C6	N7	Anc	0.692662	0.6428
C6	N7	Anc	0.853249	0.6496
C6	N7	Anc	0.852525	0.6432
C6	N7	Anc	0.797315	0.6564
C6	N7	Anc	0.812068	0.6584
C7	N7	Anc	0.699183	0.7378
C7	N7	Anc	0.727663	0.6914
C7	N7	Anc	0.676265	0.6916
C7	N7	Anc	0.60793	0.6824
C7	N7	Anc	0.775116	0.678
C7	N7	Anc	0.620239	0.6832
[truncated: 222 more rows]
